# Supplementary material for: Graphene oxide based crosslinker for simultaneous enhancement of mechanical toughness and self-healing capability of conventional hydrogels
Source: Royal Society of Chemistry journal article supplement (doi:10.1039/d2ra00122e), 2022-01-01
Supplement: d2ra00122e1.pdf [file d2ra00122e1.pdf]

*Supporting Information (SI)*

**Graphene Oxide Based Crosslinker for Simultaneous Enhancement of  
Mechanical Toughness and Self-healing Capability of Conventional Hydrogels**

Md. Mahamudul Hasan Rumon<sup>1#</sup>, Stephen Don Sarkar<sup>1#</sup>, Md. Mosfeq Uddin<sup>1</sup>,

Md. Mahbub Alam<sup>1</sup>, Sadia Nazneen Karobi<sup>2</sup>, Aruna Ayfar<sup>1</sup>, Md. Shafiul Azam<sup>1\*</sup> and  
Chanchal Kumar Roy<sup>1\*</sup>

<sup>1</sup>*Bangladesh University of Engineering and Technology (BUET), Dhaka-1000, Bangladesh*

<sup>2</sup>*Independent University Bangladesh (IUB), Dhaka-1229, Bangladesh*

<sup>#</sup>Authors have equal contribution

<sup>\*</sup>*Corresponding Authors*

azam@ualberta.ca (MSA)

ckroy@chem.buet.ac.bd (CKR)

**Table S1:** Tensile test parameters calculated from the stress-strain curves depicted in **Figure 2(a)** and **(b)** for PAM nanocomposite hydrogels having various compositions of crosslinker.

| Hydrogel            | Monomer<br>(AM)<br><br>(M) | Crosslinker<br><br>(mass% with<br>respect to AM) | Young's<br>modulus<br><br>(MPa) | Tensile<br>strength<br><br>(MPa) | Toughness<br><br>(MJ m <sup>-3</sup> ) |
|---------------------|----------------------------|--------------------------------------------------|---------------------------------|----------------------------------|----------------------------------------|
| PAM                 | 5                          | N/A                                              | 0.128±0.023                     | 0.166±0.025                      | 0.607±0.013                            |
| PAM-GO-<br>0.05%    |                            | GO 0.05%                                         | 0.307±0.032                     | 0.316±0.043                      | 0.996±0.028                            |
| PAM-MBA-<br>0.05%   |                            | MBA 0.05%                                        | 0.218±0.022                     | 0.234±0.025                      | 0.407±0.033                            |
| PAM-GOBC-<br>0.01%  |                            | GOBC 0.01%                                       | 0.150±0.035                     | 0.164±0.033                      | 1.496±0.023                            |
| PAM-GOBC-<br>0.025% |                            | GOBC 0.025%                                      | 0.196±0.044                     | 0.252±0.035                      | 1.662±0.043                            |
| PAM-GOBC-<br>0.035% |                            | GOBC 0.035%                                      | 0.296±0.040                     | 0.306±0.054                      | 1.114±0.030                            |
| PAM-GOBC-<br>0.05%  |                            | GOBC 0.05%                                       | 0.446±0.029                     | 0.473±0.36                       | 1.775±0.032                            |
